# Supplementary material for: Differential biotransformation of micropollutants in conventional activated sludge and up-flow anaerobic sludge blanket processes
Source: Royal Society of Chemistry journal article supplement (doi:10.1039/d3ew00867c), 2024-01-01
Supplement: d3ew00867c1.pdf [file d3ew00867c1.pdf]

**Electronic Supplementary Information for:**

**TITLE:** Differential biotransformation of micropollutants in conventional activated sludge and up-flow anaerobic sludge blanket processes

**AUTHORS:** M Martin<sup>a,#</sup>, Jingyi Wu<sup>a,#</sup>, Stephanie L. Rich<sup>a</sup>, Ruth E. Richardson<sup>a</sup>, Damian E. Helbling<sup>a,\*</sup>

**AFFILIATIONS:**

<sup>a</sup> School of Civil and Environmental Engineering, Cornell University, Ithaca, NY, 14853, USA

<sup>#</sup> Both authors contributed equally

<sup>\*</sup> Corresponding author: Damian E. Helbling, School of Civil and Environmental Engineering, Cornell University, 220 Hollister Hall, Ithaca, NY, 14853, USA. Email: [damian.helbling@cornell.edu](mailto:damian.helbling@cornell.edu). Tel: +1 607 255 5146. Fax: +1 607 255 9004.

# TABLE OF CONTENTS

|                                                             |    |
|-------------------------------------------------------------|----|
| <b>TABLE OF CONTENTS</b> .....                              | 2  |
| <b>LIST OF FIGURES</b> .....                                | 3  |
| <b>LIST OF TABLES</b> .....                                 | 4  |
| Methods.....                                                | 5  |
| Micropollutant standards and reagents .....                 | 5  |
| Field sampling campaign .....                               | 14 |
| Preparation of wastewater samples.....                      | 17 |
| Sample Analysis.....                                        | 18 |
| Quality Control .....                                       | 19 |
| Results and Discussion .....                                | 23 |
| Summary data from sampling of full-scale CAS and UASB. .... | 23 |
| Batch experiments – biotransformation products .....        | 26 |

## LIST OF FIGURES

**Figure S1:** Process flow diagram of the studied WWTP along with sampling locations depicted with a red (CAS\_inf) and green (CAS\_eff) X symbol. (source: <https://www.cityofithaca.org/687/Plant-Schematic>)..... S14

**Figure S2:** Process flow diagram of the studied UASB along with sampling locations depicted with a red (UASB\_inf) and green (UASB\_eff) X symbol..... S15

## LIST OF TABLES

|                                                                                                                                                                       |    |
|-----------------------------------------------------------------------------------------------------------------------------------------------------------------------|----|
| <b>Table S1:</b> List of 175 MPs with CAS numbers, chemical formulas, adducts, exact masses, retention times, and diagnostic fragments. ....                          | 5  |
| <b>Table S2:</b> List of the 51 isotope labeled internal standards (ILISs).....                                                                                       | 10 |
| <b>Table S3:</b> List of 24 MPs used in batch experiments with CAS numbers, chemical formulas, adducts, exact masses, retention times, and diagnostic fragments. .... | 13 |
| <b>Table S4:</b> WWTP operational parameters measured during the sampling period. ....                                                                                | 16 |
| <b>Table S5:</b> List of MPs with R <sup>2</sup> , LOQ, and number of detections in <i>CAS_inf</i> , <i>CAS_eff</i> , <i>UASB_inf</i> , <i>UASB_eff</i> samples. .... | 19 |
| <b>Table S6:</b> List of 94 MPs measured in <i>CAS_inf</i> and <i>UASB_inf</i> and their average concentration in all samples.....                                    | 23 |
| <b>Table S7:</b> Analytical information for the 9 detected TPs.....                                                                                                   | 26 |

## Methods

### *Micropollutant standards and reagents*

**Table S1:** List of 175 MPs with CAS numbers, chemical formulas, adducts, exact masses, retention times, and diagnostic fragments.

| Micropollutant                       | CAS Number  | Chemical Formula | Adduct             | Exact Mass (m/z) | RT (min) | Diagnostic Fragment (m/z) |
|--------------------------------------|-------------|------------------|--------------------|------------------|----------|---------------------------|
| 10,11-Dihydrocarbamazepine           | 3564-73-6   | C15H14N2O        | [M+H] <sup>+</sup> | 239.1179         | 6.7      | 194.10                    |
| 2-(Methylthio)benzothiazole          | 615-22-5    | C8H7NS2          | [M+H] <sup>+</sup> | 182.0092         | 8.5      | 135.01                    |
| 2,2,4-Trimethyl-1,2-dihydroquinoline | 147-47-7    | C12H15N          | [M+H] <sup>+</sup> | 174.1277         | 6.9      | 107.07                    |
| 2,2'-Dithiobis(benzothiazole)        | 120-78-5    | C14H8N2S4        | [M+H] <sup>+</sup> | 332.9642         | 13.9     | 109.01                    |
| 2,4-D                                | 94-75-7     | C8H6Cl2O3        | [M-H] <sup>-</sup> | 218.9621         | 7.7      | 160.96                    |
| 2,6-Dimethoxyphenol                  | 91-10-1     | C8H10O3          | [M+H] <sup>+</sup> | 155.0708         | 4.7      | 95.05                     |
| 2-Aminobenzothiazole                 | 136-95-8    | C7H6N2S          | [M+H] <sup>+</sup> | 151.0324         | 2.7      | 109.01                    |
| 2-Ethyl-2-phenylmalonamide           | 7206-76-0   | C11H14N2O2       | [M+H] <sup>+</sup> | 207.1134         | 3.1      | 119.09                    |
| 2-Mercaptobenzothiazole              | 149-30-4    | C7H5NS2          | [M+H] <sup>+</sup> | 167.9936         | 5.6      | 135.01                    |
| Abacavir                             | 136470-78-5 | C14H18N6O        | [M+H] <sup>+</sup> | 287.1620         | 3.1      | 191.10                    |
| Acebutolol                           | 37517-30-9  | C18H28N2O4       | [M+H] <sup>+</sup> | 337.2122         | 4.0      | 319.20                    |
| Acesulfame                           | 33665-90-6  | C4H5NO4S         | [M-H] <sup>-</sup> | 161.9856         | 1.5      | 82.03                     |
| Acetaminophen                        | 103-90-2    | C8H9NO2          | [M+H] <sup>+</sup> | 152.0706         | 2.1      | 110.06                    |
| Acetazolamide                        | 59-66-5     | C4H6N4O3S2       | [M+H] <sup>+</sup> | 222.9954         | 2.2      | 181.97                    |
| Adenosine                            | 58-61-7     | C10H13N5O4       | [M+H] <sup>+</sup> | 268.1040         | 1.3      | 136.06                    |
| Adrenalone                           | 99-45-6     | C9H11NO3         | [M+H] <sup>+</sup> | 182.0812         | 1.1      | 146.06                    |
| Adrenosterone                        | 382-45-6    | C19H24O3         | [M+H] <sup>+</sup> | 301.1803         | 6.2      | 257.15                    |
| Alachlor                             | 15972-60-8  | C14H20ClNO2      | [M+H] <sup>+</sup> | 270.1255         | 10.1     | 162.13                    |
| Alachlor OA                          | 171262-17-2 | C14H19NO4        | [M-H] <sup>-</sup> | 264.1241         | 6.1      | 160.11                    |
| Albuterol                            | 18559-94-9  | C13H21NO3        | [M+H] <sup>+</sup> | 240.1594         | 2.0      | 148.08                    |
| Allopurinol                          | 315-30-0    | C5H4N4O          | [M+H] <sup>+</sup> | 137.0463         | 1.3      | 90.95                     |
| Amisulpride                          | 71675-85-9  | C17H27N3O4S      | [M+H] <sup>+</sup> | 370.1795         | 3.0      | 242.05                    |
| Amitriptyline                        | 50-48-6     | C20H23N          | [M+H] <sup>+</sup> | 278.1903         | 7.3      | 91.05                     |
| Amphetamine                          | 300-62-9    | C9H13N           | [M+H] <sup>+</sup> | 131.1121         | 3.0      | 91.05                     |
| Ampicillin                           | 69-53-4     | C16H19N3O4S      | [M+H] <sup>+</sup> | 350.1169         | 4.6      | 192.05                    |
| Arecoline                            | 63-75-2     | C8H13NO2         | [M+H] <sup>+</sup> | 156.1019         | 1.1      | 113.06                    |
| Atenolol                             | 29122-68-7  | C14H22N2O3       | [M+H] <sup>+</sup> | 267.1703         | 2.0      | 190.09                    |
| Atenolol Acid                        | 56392-14-4  | C14H21NO4        | [M+H] <sup>+</sup> | 268.1543         | 3.0      | 191.07                    |
| Atomoxetine                          | 83015-26-3  | C17H21NO         | [M+H] <sup>+</sup> | 256.1696         | 6.6      | 224.08                    |
| Atorvastatin                         | 134523-00-5 | C33H35FN2O5      | [M+H] <sup>+</sup> | 559.2603         | 10.7     | 440.22                    |

|                             |             |               |                    |          |      |        |
|-----------------------------|-------------|---------------|--------------------|----------|------|--------|
| Atrazine                    | 1912-24-9   | C8H14ClN5     | [M+H] <sup>+</sup> | 216.1011 | 6.9  | 174.05 |
| Atrazine-2-hydroxy          | 2163-68-0   | C8H15N5O      | [M+H] <sup>+</sup> | 198.1349 | 3.5  | 156.09 |
| Atrazine-desethyl           | 6190-65-4   | C6H10ClN5     | [M+H] <sup>+</sup> | 188.0697 | 4.6  | 146.02 |
| Atropine                    | 55-48-1     | C17H23NO3     | [M+H] <sup>+</sup> | 290.1751 | 3.5  | 260.16 |
| Baclofen                    | 1134-47-0   | C10H12ClNO2   | [M+H] <sup>+</sup> | 214.0635 | 3.3  | 151.03 |
| Bentazone                   | 25057-89-0  | C10H12N2O3S   | [M-H] <sup>-</sup> | 239.0496 | 6.3  | 175.09 |
| Benzophenone                | 119-61-9    | C13H10O       | [M+H] <sup>+</sup> | 183.0810 | 8.7  | 105.03 |
| Benzothiazole               | 95-16-9     | C7H5NS        | [M+H] <sup>+</sup> | 136.0216 | 5.4  | 109.01 |
| Benzotriazole               | 95-14-7     | C6H5N3        | [M+H] <sup>+</sup> | 120.0556 | 3.6  | 92.05  |
| Benzoyllecgonine            | 519-09-5    | C16H19NO4     | [M+H] <sup>+</sup> | 290.1387 | 3.7  | 168.10 |
| Bupropion                   | 34911-55-2  | C13H18ClNO    | [M+H] <sup>+</sup> | 240.1156 | 4.8  | 166.04 |
| Butalbital                  | 77-26-9     | C11H16N2O3    | [M-H] <sup>-</sup> | 223.1083 | 5.8  | 136.37 |
| Caffeine                    | 58-08-2     | C8H10N4O2     | [M+H] <sup>+</sup> | 195.0877 | 3.2  | 138.07 |
| Candesartan                 | 139481-59-7 | C24H20N6O3    | [M+H] <sup>+</sup> | 441.1670 | 7.8  | 263.13 |
| Carbamazepine               | 298-46-4    | C15H12N2O     | [M+H] <sup>+</sup> | 237.1022 | 6.4  | 194.10 |
| Carbamazepine-10,11-epoxide | 36507-30-9  | C15H12N2O2    | [M+H] <sup>+</sup> | 253.0972 | 5.1  | 180.08 |
| Carbendazim                 | 10605-21-7  | C9H9N3O2      | [M+H] <sup>+</sup> | 192.0768 | 2.8  | 160.05 |
| Carisoprodol                | 78-44-4     | C12H24N2O4    | [M+H] <sup>+</sup> | 261.1816 | 7.3  | 158.12 |
| Celecoxib                   | 169590-42-5 | C17H14F3N3O2S | [M+H] <sup>+</sup> | 382.0837 | 10.5 | 362.08 |
| Cetirizine                  | 83881-51-0  | C21H25ClN2O3  | [M+H] <sup>+</sup> | 389.1627 | 7.8  | 201.05 |
| Chlorpheniramine            | 132-22-9    | C16H19ClN2    | [M+H] <sup>+</sup> | 275.1309 | 4.8  | 230.07 |
| Cimetidine                  | 51481-61-9  | C10H16N6S     | [M+H] <sup>+</sup> | 253.1236 | 2.1  | 159.07 |
| Ciprofloxacin               | 85721-33-1  | C17H18FN3O3   | [M+H] <sup>+</sup> | 332.1405 | 3.5  | 288.15 |
| Citalopram                  | 59729-33-8  | C20H21FN2O    | [M+H] <sup>+</sup> | 325.1711 | 5.5  | 262.10 |
| Citric acid                 | 77-92-9     | C6H8O7        | [M-H] <sup>-</sup> | 191.0186 | 1.2  | 87.92  |
| Clarithromycin              | 81103-11-9  | C38H69NO13    | [M+H] <sup>+</sup> | 748.4842 | 8.3  | 590.39 |
| Climbazole                  | 38083-17-9  | C15H17ClN2O2  | [M+H] <sup>+</sup> | 293.1057 | 6.6  | 197.07 |
| Clindamycin                 | 18323-44-9  | C18H33ClN2O5S | [M+H] <sup>+</sup> | 425.1872 | 5.6  | 126.13 |
| Codeine                     | 76-57-3     | C18H21NO3     | [M+H] <sup>+</sup> | 300.1594 | 2.2  | 243.10 |
| Corticosterone              | 50-22-6     | C21H30O4      | [M+H] <sup>+</sup> | 347.2217 | 7.6  | 121.06 |
| Cotinine                    | 486-56-6    | C10H12N2O     | [M+H] <sup>+</sup> | 177.1022 | 1.2  | 146.06 |
| Coumarin                    | 91-64-5     | C9H6O2        | [M+H] <sup>+</sup> | 147.0441 | 4.7  | 91.05  |
| DEET                        | 134-62-3    | C12H17NO      | [M+H] <sup>+</sup> | 192.1383 | 7.1  | 119.05 |
| Desmethylvenlafaxine        | 93413-62-8  | C16H25NO2     | [M+H] <sup>+</sup> | 264.1958 | 3.9  | 201.13 |
| Dexamethasone               | 50-02-2     | C22H29FO5     | [M+H] <sup>+</sup> | 393.2072 | 7.6  | 237.13 |
| Dextromethorphan            | 125-71-3    | C18H25NO      | [M+H] <sup>+</sup> | 272.2009 | 5.5  | 215.14 |
| Diclofenac                  | 15307-86-5  | C14H11Cl2NO2  | [M+H] <sup>+</sup> | 296.0240 | 11.1 | 215.05 |
| Diethyl phthalate           | 84-66-2     | C12H14O4      | [M+H] <sup>+</sup> | 223.0965 | 7.4  | 149.02 |
| Dimethyl phthalate          | 131-11-3    | C10H10O4      | [M+H] <sup>+</sup> | 195.0652 | 5.3  | 149.02 |

|                                  |             |               |                     |          |      |        |
|----------------------------------|-------------|---------------|---------------------|----------|------|--------|
| Diphenhydramine                  | 58-73-1     | C17H21NO      | [M+H] <sup>+</sup>  | 256.1701 | 5.6  | 167.09 |
| Efavirenz                        | 154598-52-4 | C14H9ClF3NO2  | [M+H] <sup>+</sup>  | 316.0352 | 11.2 | 244.01 |
| Emtricitabine                    | 143491-57-0 | C8H10FN3O3S   | [M+H] <sup>+</sup>  | 248.0500 | 2.0  | 130.04 |
| Estrone                          | 53-16-7     | C18H22O2      | [M+H] <sup>+</sup>  | 271.1698 | 8.7  | 157.06 |
| Ethyl Butylacetylaminopropionate | 52304-36-6  | C11H21NO3     | [M+H] <sup>+</sup>  | 216.1594 | 6.3  | 188.10 |
| Famciclovir                      | 104227-87-4 | C14H19N5O4    | [M+H] <sup>+</sup>  | 322.1510 | 3.3  | 202.11 |
| Famotidine                       | 76824-35-6  | C8H15N7O2S3   | [M+H] <sup>+</sup>  | 338.0527 | 2.1  | 189.03 |
| Fenofibric Acid                  | 42017-89-0  | C17H15ClO4    | [M+H] <sup>+</sup>  | 319.0732 | 10.9 | 233.04 |
| Fexofenadine                     | 83799-24-0  | C32H39NO4     | [M+H] <sup>+</sup>  | 502.2958 | 6.9  | 466.27 |
| Fluconazole                      | 86386-73-4  | C13H12F2N6O   | [M+H] <sup>+</sup>  | 307.1113 | 4.3  | 220.07 |
| Flucytosine                      | 2022-85-7   | C4H4FN3O      | [M+H] <sup>+</sup>  | 130.0411 | 2.0  | 71.06  |
| Fluoxetine                       | 54910-89-3  | C17H18F3NO    | [M+H] <sup>+</sup>  | 310.1413 | 7.9  | 265.16 |
| Fluridone                        | 59756-60-4  | C19H14F3NO    | [M+H] <sup>+</sup>  | 330.1100 | 8.0  | 310.10 |
| Furosemide                       | 54-31-9     | C12H11ClN2O5S | [M-H] <sup>-</sup>  | 328.9999 | 5.5  | 204.98 |
| Gabapentin                       | 60142-96-3  | C9H17NO2      | [M+H] <sup>+</sup>  | 172.1332 | 2.9  | 137.10 |
| Gabapentin-lactam                | 64744-50-9  | C9H15NO       | [M+H] <sup>+</sup>  | 154.1227 | 3.0  | 137.10 |
| Gemfibrozil                      | 25812-30-0  | C15H22O3      | [M+H] <sup>+</sup>  | 251.1641 | 13.0 | 83.09  |
| Hexamethylphosphoramide          | 680-31-9    | C6H18N3OP     | [M+H] <sup>+</sup>  | 180.1260 | 4.3  | 135.07 |
| Hydrochlorothiazide              | 58-93-5     | C7H8ClN3O4S2  | [M-H] <sup>-</sup>  | 295.9572 | 2.2  | 204.98 |
| Hydrocodone                      | 125-29-1    | C18H21NO3     | [M+H] <sup>+</sup>  | 300.1599 | 2.3  | 199.08 |
| Hydrocortisone                   | 50-23-7     | C21H30O5      | [M+H] <sup>+</sup>  | 363.2171 | 6.6  | 121.06 |
| Ibuprofen                        | 15687-27-1  | C13H18O2      | [M+Na] <sup>+</sup> | 229.1199 | 11.5 | 151.04 |
| Iodocarb                         | 55406-53-6  | C8H12INO2     | [M+H] <sup>+</sup>  | 281.9958 | 7.0  | 164.92 |
| Iohexol                          | 66108-95-0  | C19H26I3N3O9  | [M+H] <sup>+</sup>  | 821.8876 | 1.6  | 803.88 |
| Iopromide                        | 73334-07-3  | C18H24I3N3O8  | [M+H] <sup>+</sup>  | 791.8770 | 2.3  | 572.90 |
| Irbesartan                       | 138402-11-6 | C25H28N6O     | [M+H] <sup>+</sup>  | 429.2397 | 7.5  | 386.22 |
| Irgarol                          | 28159-98-0  | C11H19N5S     | [M+H] <sup>+</sup>  | 254.1434 | 7.4  | 198.08 |
| Isophorone Diisocyanate          | 4098-71-9   | C12H18N2O2    | [M+K] <sup>+</sup>  | 261.0995 | 6.7  | 204.96 |
| Ketamine                         | 6740-88-1   | C13H16ClNO    | [M+H] <sup>+</sup>  | 238.0998 | 3.6  | 179.06 |
| Ketoprofen                       | 22071-15-4  | C16H14O3      | [M+H] <sup>+</sup>  | 255.1016 | 8.1  | 209.10 |
| Lamotrigine                      | 84057-84-1  | C9H7Cl2N5     | [M+H] <sup>+</sup>  | 256.0151 | 4.4  | 210.98 |
| Levamisole                       | 14769-73-4  | C11H12N2S     | [M+H] <sup>+</sup>  | 205.0794 | 2.5  | 178.07 |
| Levetiracetam                    | 102767-28-2 | C8H14N2O2     | [M+H] <sup>+</sup>  | 171.1123 | 2.6  | 126.09 |
| Levofloxacin                     | 100986-85-4 | C18H20FN3O4   | [M+H] <sup>+</sup>  | 362.1511 | 3.6  | 261.10 |
| Lidocaine                        | 137-58-6    | C14H22N2O     | [M+H] <sup>+</sup>  | 235.1805 | 3.4  | 86.10  |
| Losartan                         | 114798-26-4 | C22H23ClN6O   | [M+H] <sup>+</sup>  | 423.1695 | 7.5  | 235.10 |
| Mabuterol                        | 56341-08-3  | C13H18ClF3N2O | [M+H] <sup>+</sup>  | 311.1138 | 4.4  | 237.04 |
| Mecoprop                         | 93-65-2     | C10H11ClO3    | [M-H] <sup>-</sup>  | 213.0324 | 9.3  | 141.01 |
| Melamine                         | 108-78-1    | C3H6N6        | [M+H] <sup>+</sup>  | 127.0727 | 1.1  | 85.05  |

|                               |             |              |                    |          |      |        |
|-------------------------------|-------------|--------------|--------------------|----------|------|--------|
| Meprobamate                   | 57-53-4     | C9H18N2O4    | [M+H] <sup>+</sup> | 219.1345 | 5.2  | 203.14 |
| Metalaxyl                     | 57837-19-1  | C15H21NO4    | [M+H] <sup>+</sup> | 280.1543 | 7.2  | 160.11 |
| Metaxalone                    | 1665-48-1   | C12H15NO3    | [M+H] <sup>+</sup> | 222.1125 | 6.7  | 133.10 |
| Metformin                     | 657-24-9    | C4H11N5      | [M+H] <sup>+</sup> | 130.1087 | 1.1  | 71.06  |
| Methadone                     | 76-99-3     | C21H27NO     | [M+H] <sup>+</sup> | 310.2165 | 7.0  | 265.16 |
| Methocarbamol                 | 532-03-6    | C11H15NO5    | [M+H] <sup>+</sup> | 242.1028 | 4.5  | 163.08 |
| Metolachlor                   | 51218-45-2  | C15H22ClNO2  | [M+H] <sup>+</sup> | 284.1412 | 10.1 | 111.04 |
| Metolachlor ESA               | 171118-09-5 | C15H23NO5S   | [M+H] <sup>+</sup> | 330.1370 | 6.5  | 298.11 |
| Metolachlor OA                | 152019-73-3 | C15H21NO4    | [M-H] <sup>-</sup> | 278.1398 | 7.6  | 158.10 |
| Metoprolol                    | 51384-51-1  | C15H25NO3    | [M+H] <sup>+</sup> | 268.1907 | 4.0  | 159.08 |
| Metronidazole                 | 443-48-1    | C6H9N3O3     | [M+H] <sup>+</sup> | 172.0717 | 2.0  | 128.05 |
| Morphine                      | 57-27-2     | C17H19NO3    | [M+H] <sup>+</sup> | 286.1438 | 1.4  | 201.09 |
| N,N-Didesmethylvenlafaxine    | 93413-77-5  | C15H23NO2    | [M+H] <sup>+</sup> | 250.1802 | 5.2  | 147.08 |
| N4-Acetylsulfamethoxazole     | 21312-10-7  | C12H13N3O4S  | [M+H] <sup>+</sup> | 296.0700 | 4.5  | 198.02 |
| Nadolol                       | 42200-33-9  | C17H27NO4    | [M+H] <sup>+</sup> | 310.2013 | 3.3  | 254.14 |
| Naproxen                      | 22204-53-1  | C14H14O3     | [M+H] <sup>+</sup> | 231.1016 | 8.6  | 185.10 |
| Nicotine                      | 54-11-5     | C10H14N2     | [M+H] <sup>+</sup> | 163.1230 | 1.1  | 102.97 |
| Norfloxacin                   | 70458-96-7  | C16H18FN3O3  | [M+H] <sup>+</sup> | 320.1405 | 3.4  | 276.15 |
| Ofloxacin                     | 82419-36-1  | C18H20FN3O4  | [M+H] <sup>+</sup> | 362.1511 | 3.3  | 318.16 |
| Oxazepam                      | 604-75-1    | C15H11ClN2O2 | [M+H] <sup>+</sup> | 287.0558 | 7.5  | 241.05 |
| Oxcarbazepine                 | 28721-07-5  | C15H12N2O2   | [M+H] <sup>+</sup> | 253.0972 | 5.1  | 180.08 |
| Oxybenzone                    | 131-57-7    | C14H12O3     | [M+H] <sup>+</sup> | 229.0864 | 10.4 | 151.04 |
| Paraxanthine                  | 611-59-6    | C7H8N4O2     | [M+H] <sup>+</sup> | 181.0726 | 2.9  | 124.05 |
| Penciclovir                   | 39809-25-1  | C10H15N5O3   | [M+H] <sup>+</sup> | 254.1248 | 1.3  | 152.06 |
| Pentobarbital                 | 57-33-0     | C11H18N2O3   | [M+H] <sup>+</sup> | 227.1396 | 2.7  | 86.06  |
| Pentoxifylline                | 6493-05-6   | C13H18N4O3   | [M+H] <sup>+</sup> | 279.1457 | 4.5  | 181.07 |
| Perfluorobutanoic Acid (PFBA) | 375-22-4    | C4HF7O2      | [M-H] <sup>-</sup> | 212.9792 | 4.3  | 168.99 |
| Perfluorooctanoic Acid (PFOA) | 335-67-1    | C8HF15O2     | [M-H] <sup>-</sup> | 412.9664 | 11.0 | 168.99 |
| Phenobarbital                 | 50-06-6     | C12H12N2O3   | [M-H] <sup>-</sup> | 231.0770 | 5.0  | 160.08 |
| Phenytoin                     | 57-41-0     | C15H12N2O2   | [M+H] <sup>+</sup> | 253.0977 | 6.2  | 182.10 |
| Primidone                     | 125-33-7    | C12H14N2O2   | [M+H] <sup>+</sup> | 219.1128 | 4.4  | 91.05  |
| Progesterone                  | 57-83-0     | C21H30O2     | [M+H] <sup>+</sup> | 315.2324 | 11.1 | 97.06  |
| Prometon                      | 1610-18-0   | C10H19N5O    | [M+H] <sup>+</sup> | 226.1662 | 5.5  | 142.07 |
| Propazine                     | 139-40-2    | C9H16ClN5    | [M+H] <sup>+</sup> | 230.1167 | 8.3  | 146.02 |
| Propranolol                   | 525-66-6    | C16H21NO2    | [M+H] <sup>+</sup> | 260.1650 | 5.5  | 183.08 |
| Pseudoephedrine               | 90-82-4     | C10H15NO     | [M+H] <sup>+</sup> | 166.1229 | 2.5  | 148.11 |
| rac threo-Dihydrobupropion    | 92264-82-9  | C13H20ClNO   | [M+H] <sup>+</sup> | 242.1306 | 5.0  | 162.06 |
| Ranitidine                    | 66357-35-5  | C13H22N4O3S  | [M+H] <sup>+</sup> | 315.1485 | 2.0  | 176.05 |
| Ritalinic Acid                | 19395-41-6  | C13H17NO2    | [M+H] <sup>+</sup> | 220.1332 | 3.8  | 174.13 |



|                                              |             |              |                       |          |      |        |
|----------------------------------------------|-------------|--------------|-----------------------|----------|------|--------|
| Saccharin                                    | 81-07-2     | C7H5NO3S     | [M-H] <sup>-</sup>    | 181.9917 | 2.3  | 61.97  |
| Serotonin                                    | 50-67-9     | C10H12N2O    | [M+H] <sup>+</sup>    | 177.1022 | 1.1  | 146.06 |
| Siduron                                      | 1982-49-6   | C14H20N2O    | [M+H] <sup>+</sup>    | 233.1654 | 8.5  | 137.07 |
| Simazine                                     | 122-34-9    | C7H12ClN5    | [M+H] <sup>+</sup>    | 202.0854 | 5.7  | 132.03 |
| Sitagliptin                                  | 486460-32-6 | C16H15F6N5O  | [M+H] <sup>+</sup>    | 408.1254 | 4.3  | 235.08 |
| Sotalol                                      | 3930-20-9   | C12H20N2O3S  | [M+H] <sup>+</sup>    | 273.1267 | 1.8  | 213.07 |
| Sucralose                                    | 56038-13-2  | C12H19Cl3O8  | [M+FA-H] <sup>-</sup> | 441.0128 | 3.6  | 278.15 |
| Sulfadimethoxine                             | 122-11-2    | C12H14N4O4S  | [M+H] <sup>+</sup>    | 311.0809 | 4.7  | 156.08 |
| Sulfamethazine                               | 57-68-1     | C12H14N4O2S  | [M+H] <sup>+</sup>    | 279.0910 | 3.0  | 204.04 |
| Sulfamethoxazole                             | 723-46-6    | C10H11N3O3S  | [M+H] <sup>+</sup>    | 254.0594 | 3.8  | 156.01 |
| Sulfathiazole                                | 72-14-0     | C9H9N3O2S2   | [M+H] <sup>+</sup>    | 256.0209 | 2.4  | 108.04 |
| Temazepam                                    | 846-50-4    | C16H13ClN2O2 | [M+H] <sup>+</sup>    | 301.0744 | 7.8  | 255.07 |
| Testosterone                                 | 58-22-0     | C19H28O2     | [M+H] <sup>+</sup>    | 289.2162 | 9.1  | 253.20 |
| Theophylline                                 | 58-55-9     | C7H8N4O2     | [M+H] <sup>+</sup>    | 181.0726 | 2.9  | 124.05 |
| Thiabendazole                                | 148-79-8    | C10H7N3S     | [M+H] <sup>+</sup>    | 202.0433 | 3.3  | 175.03 |
| Tramadol                                     | 123154-38-1 | C16H25NO2    | [M+H] <sup>+</sup>    | 264.1958 | 3.9  | 201.13 |
| Triamterene                                  | 396-01-0    | C12H11N7     | [M+H] <sup>+</sup>    | 254.1154 | 3.8  | 237.09 |
| Tributyl phosphate                           | 126-73-8    | C12H27O4P    | [M+H] <sup>+</sup>    | 267.1725 | 12.6 | 155.05 |
| Triclosan                                    | 3380-34-5   | C12H7Cl3O2   | [M-H] <sup>-</sup>    | 286.9439 | 13.1 | 165.89 |
| Triethyl phosphate                           | 78-40-0     | C6H15O4P     | [M+H] <sup>+</sup>    | 183.0781 | 5.1  | 98.98  |
| Trimethoprim                                 | 738-70-5    | C14H18N4O3   | [M+H] <sup>+</sup>    | 291.1452 | 3.0  | 245.10 |
| Triphenyl phosphate                          | 115-86-6    | C18H15O4P    | [M+H] <sup>+</sup>    | 327.0781 | 11.5 | 327.08 |
| Tris(1,3-dichloro-2-propyl)phosphate (TDCPP) | 13674-87-8  | C9H15Cl6O4P  | [M+H] <sup>+</sup>    | 428.8917 | 11.5 | 98.98  |
| Tris(2-chloroethyl) phosphate                | 115-96-8    | C6H12Cl3O4P  | [M+H] <sup>+</sup>    | 284.9612 | 6.0  | 160.98 |
| Valsartan                                    | 137862-53-4 | C24H29N5O3   | [M+H] <sup>+</sup>    | 436.2343 | 9.4  | 235.10 |
| Venlafaxine                                  | 93413-69-5  | C17H27NO2    | [M+H] <sup>+</sup>    | 278.2115 | 5.1  | 58.07  |
| Verapamil                                    | 52-53-9     | C27H38N2O4   | [M+H] <sup>+</sup>    | 455.2910 | 6.0  | 303.21 |
| Warfarin                                     | 81-81-2     | C19H16O4     | [M+H] <sup>+</sup>    | 309.1121 | 9.0  | 251.07 |

**Table S2:** List of the 51 isotope labeled internal standards (ILISs).

| Internal Standard             | CAS Number   | Chemical Formula  | RT (min) | Adduct             | Extracted Mass (m/z) | Reference MP(s)                                                                                                                                |
|-------------------------------|--------------|-------------------|----------|--------------------|----------------------|------------------------------------------------------------------------------------------------------------------------------------------------|
| 17-beta-estradiol-d5          | 221093-45-4  | C18H19O2D5        | 1.0      | [M+H] <sup>+</sup> | 278.2162             | n/a                                                                                                                                            |
| 2-methyl-3-isothiazolinone-d3 | n/a          | C4D3H2NOS         | 1.5      | [M+H] <sup>+</sup> | 119.0353             | Arecoline, Flucytosine, Melamine                                                                                                               |
| Iodocarb-d9                   | 1246815-08-6 | C8H3D9INO2        | 7.0      | [M+H] <sup>+</sup> | 291.0550             | Iodocarb, Candesartan                                                                                                                          |
| Acetaminophen-d4              | 64315-36-2   | C8D4H5NO2         | 2.1      | [M+H] <sup>+</sup> | 156.0963             | 2-Aminobenzothiazole, Acetaminophen, Cimetidine, Famotidine, Hydrochlorothiazide, Levamisole                                                   |
| Allopurinol-d2                | 916979-34-5  | C5H2D2N4O         | 1.3      | [M+H] <sup>+</sup> | 139.0583             | Cotinine, Adrenalone, Allopurinol, Nicotine, Metformin, Penciclovir                                                                            |
| Atenolol-d7                   | 1202864-50-3 | C14D7H15N2O3      | 2.0      | [M+H] <sup>+</sup> | 274.2148             | Atenolol, Metronidazole, Pentobarbital                                                                                                         |
| Atrazine-d5                   | 163165-75-1  | C8H9D5Cl1N5       | 6.9      | [M+H] <sup>+</sup> | 221.1330             | 2,2,4-Trimethyl-1,2-dihydroquinoline, Atomoxetine, Atrazine-2-hydroxy, Atrazine-desethyl, Climbazole, Metaxalone, Methadone, Simazine          |
| Azoxystrobin-d4               | 1346606-39-0 | C22H13D4N3O5      | 8.3      | [M+H] <sup>+</sup> | 408.1492             | Clarithromycin, Corticosterone, Oxazepam, Propazine, Testosterone                                                                              |
| Bisphenol A-d16               | 96210-87-6   | C15D16O2          | 11.7     | [M+H] <sup>+</sup> | 245.2227             | n/a                                                                                                                                            |
| Caffeine-13C3                 | 78072-66-9   | [13]C3C5H10N4O2   | 3.2      | [M+H] <sup>+</sup> | 198.0977             | Caffeine, Levofloxacin, Paraxanthine                                                                                                           |
| Carbamazepine-13C6            | n/a          | [13]C6C9H12N2O    | 6.3      | [M+H] <sup>+</sup> | 243.1224             | 10,11-Dihydrocarbamazepine, Carbamazepine, Carbamazepine-10,11-epoxide, DEET, Ethyl Butylacetylaminopropionate, Metolachlor-ESA, Oxcarbazepine |
| Carbaryl-d7                   | 362049-56-7  | C12H4D7NO2        | 6.2      | [M+H] <sup>+</sup> | 209.1302             | Hydrocortisone, Prometon                                                                                                                       |
| Carbofuran-d3                 | 1007459-98-4 | C12H12D3NO3       | 5.8      | [M+H] <sup>+</sup> | 225.1313             | 2-Mercaptobenzothiazole, Adrenosterone, Dexamethasone, Estrone, Ketoprofen, Pentoxifylline, Phenytoin                                          |
| Celecoxib-d4                  | 544686-20-6  | C17H10D4F3N3O2S   | 10.5     | [M+H] <sup>+</sup> | 386.1083             | Celecoxib                                                                                                                                      |
| Cimetidine-d3                 | 1185237-29-9 | C10D3H13N6S       | 2.1      | [M+H] <sup>+</sup> | 256.1418             | n/a                                                                                                                                            |
| Ciprofloxacin-d8              | 1216659-54-9 | C17D8H10FN3O3     | 3.5      | [M+H] <sup>+</sup> | 340.1907             | Ciprofloxacin                                                                                                                                  |
| Citalopram-d6                 | 1246819-94-2 | C20D6H15FN2O      | 5.5      | [M+H] <sup>+</sup> | 331.2087             | Benzothiazole, Bupropion, Citalopram, Coumarin, Diphenhydramine,                                                                               |
| Dextromethorphan-d3           | 524713-56-2  | C18D3H22NO        | 5.5      | [M+H] <sup>+</sup> | 275.2197             | Propranolol, Dextromethorphan, Triethyl phosphate                                                                                              |
| Diazinon-d10                  | 100155-47-3  | C12D10H11N2O3PS   | 7.8      | [M+H] <sup>+</sup> | 315.1711             | n/a                                                                                                                                            |
| Diclofenac-13C6               | 15307-79-6   | [13]C6C8H11Cl2NO2 | 11.1     | [M+H] <sup>+</sup> | 302.0441             | Diclofenac, Fenofibric acid, Progesterone                                                                                                      |
| Diltiazem-d4                  | 112259-40-2  | C22D4H22N2O4S     | 6.1      | [M+H] <sup>+</sup> | 419.1937             | Clindamycin, , Verapamil                                                                                                                       |

|                                |              |                   |      |                    |          |                                                                                                                                                                             |
|--------------------------------|--------------|-------------------|------|--------------------|----------|-----------------------------------------------------------------------------------------------------------------------------------------------------------------------------|
| Dimethoate-d6                  | 1219794-81-6 | C5H6D6NO3PS2      | 4.2  | [M+H] <sup>+</sup> | 236.0446 | 2,6-Dimethoxyphenol, Acebutolol, Fluconazole, Hexamethylphosphoramide, Lamotrigine, Mabuterol, Methocarbamol, Metoprolol, N4-Acetylsulfamethoxazole, Primidone, Sitagliptin |
| Erythromycin-13C,d3            | 114-07-8     | [13]CC36D3H64NO13 | 6.8  | [M+H] <sup>+</sup> | 738.4907 | n/a                                                                                                                                                                         |
| Estrone-d2                     | 350820-16-5  | C18H20D2O2        | 8.7  | [M+H] <sup>+</sup> | 273.1818 | Irgarol, Warfarin                                                                                                                                                           |
| Fexofenadine-d6                | 548783-71-7  | C32H33D6NO4       | 6.9  | [M+H] <sup>+</sup> | 508.3328 | , Fexofenadine                                                                                                                                                              |
| Fluoxetine-d5                  | 1173020-43-3 | C17D5H13F3NO      | 7.9  | [M+H] <sup>+</sup> | 315.1727 | Cetirizine, Fluoxetine, Fluridone                                                                                                                                           |
| Gemfibrozil-d6                 | 1184986-45-5 | C15H16D6O3        | 13.0 | [M+H] <sup>+</sup> | 257.2018 | Gemfibrozil                                                                                                                                                                 |
| Ibuprofen-d3                   | 121662-14-4  | C13D3H15O2        | 11.5 | [M+H] <sup>+</sup> | 232.1387 | Atorvastatin, Ibuprofen, Tributyl phosphate                                                                                                                                 |
| Imidacloprid-d4                | 1015855-75-0 | C9D4H6C11N5O2     | 3.8  | [M+H] <sup>+</sup> | 260.0852 | NA                                                                                                                                                                          |
| Iopromide-d3                   | 1189947-73-6 | C18D3H21I3N3O8    | 2.3  | [M+H] <sup>+</sup> | 794.8959 | 2-(Methylthio)benzothiazole, 2-Ethyl-2-phenylmalonamide, Iopromide, Levetiracetam, Pseudoephedrine                                                                          |
| Isoproturon-d6                 | 217487-17-7  | C12H12D6N2O       | 7.2  | [M+H] <sup>+</sup> | 213.1869 | Amitriptyline, Benzophenone, Carisoprodol, Diethyl phthalate, Dimethyl phthalate, Irbesartan, Isophorone Diisocyanate, Losartan, Metalaxyl, Temazepam, Valsartan            |
| Mecoprop-d3                    | 352431-15-3  | C10H8D3ClO3       | 9.3  | [M-H] <sup>-</sup> | 216.0501 | 2,4-D, Acesulfame, Bentazone, Butalbital, Mecoprop, , Metolachlor OA                                                                                                        |
| Metformin-d6                   | 1185166-01-1 | C4D6H5N5          | 1.1  | [M+H] <sup>+</sup> | 136.1464 | n/a                                                                                                                                                                         |
| Metoprolol Acid-d5             | 1215404-47-9 | C14H16D5NO4       | 3.0  | [M+H] <sup>+</sup> | 273.1863 | Amphetamine, Atenolol acid, Acetazolamide, Albuterol, Amisulpride, Carbendazim, Codeine, , Gabapentin, Gabapentin-lactam, Norfloxacin, Ofloxacin                            |
| Morphine-d3                    | 67293-88-3   | C17D3H16NO3       | 1.4  | [M+H] <sup>+</sup> | 289.1626 | Adenosine, Emtricitabine, Hydrocodone, Iohexol, Morphine, Serotonin, Sotalol                                                                                                |
| Naproxen-methoxy-d3            | 958293-79-3  | C14D3H11O3        | 8.6  | [M+H] <sup>+</sup> | 234.1204 | Metolachlor, Naproxen, Siduron                                                                                                                                              |
| Oxybenzone-d3                  | 131-57-7     | C14H9D3O3         | 10.4 | [M+H] <sup>+</sup> | 232.1048 | , Oxybenzone                                                                                                                                                                |
| Pirimiticarb-d6                | 1015854-66-6 | C11D6H12N4O2      | 3.8  | [M+H] <sup>+</sup> | 245.1879 | Tramadol                                                                                                                                                                    |
| rac-Efavirenz-d4               | 1246812-58-7 | C14H5D4ClF3NO2    | 11.1 | [M+H] <sup>+</sup> | 320.0597 | Efavirenz, Triphenyl phosphate                                                                                                                                              |
| Ranitidine-d6                  | 1185238-09-8 | C13H16D6N4O3S     | 2.0  | [M+H] <sup>+</sup> | 321.1862 | Ranitidine                                                                                                                                                                  |
| Sertraline-d3                  | 1217741-83-7 | C17D3H14Cl2N      | 8.3  | [M+H] <sup>+</sup> | 309.0999 | n/a                                                                                                                                                                         |
| Sucralose-d6                   | 1459161-55-7 | C12H13D6Cl3O8     | 3.6  | [M-H] <sup>-</sup> | 447.0499 | Alachlor OA, Citric acid, Furosemide, Phenobarbital, Saccharin, Sucralose                                                                                                   |
| Sulfadimethoxine-d6            | 73068-02-7   | C12D6H8N4O4S      | 4.7  | [M+H] <sup>+</sup> | 317.1185 | Ampicillin, Sulfadimethoxine, Sulfamethazine, Sulfamethoxazole, Sulfathiazole                                                                                               |
| Sulfamethoxazole-(phenyl-13C6) | 1196157-90-0 | [13]C6C4H11N3O3S  | 3.8  | [M+H] <sup>+</sup> | 260.0795 | n/a                                                                                                                                                                         |
| 13C8 – PFOA                    | n/a          | [13]C8HF15O2      | 11.0 | [M-H] <sup>-</sup> | 420.9921 | PFBA, PFOA                                                                                                                                                                  |

|                                  |              |               |      |                    |          |                                                                                                                                           |
|----------------------------------|--------------|---------------|------|--------------------|----------|-------------------------------------------------------------------------------------------------------------------------------------------|
| 13C8 – PFOS                      | n/a          | [13]C8HF17O3S | 12.0 | [M-H] <sup>-</sup> | 506.9559 | n/a                                                                                                                                       |
| Thiabendazole-d4                 | 1190007-20-5 | C10H3D4N3S    | 3.3  | [M+H] <sup>+</sup> | 206.0685 | Atropine, Baclofen, Benzotriazole, Benzoylcegonine, Famciclovir, Ketamine, Lidocaine, Nadolol, Ritalinic acid, Thiabendazole, Triamterene |
| Triclosan-d3                     | 1020719-98-5 | C12H4D3Cl3O2  | 13.1 | [M-H] <sup>-</sup> | 289.9627 | Triclosan                                                                                                                                 |
| Trimethoprim-d9                  | 1189460-62-5 | C14D9H9N4O3   | 2.9  | [M+H] <sup>+</sup> | 300.2016 | Abacavir, Trimethoprim                                                                                                                    |
| Tris(2-chloroethyl)phosphate-d12 | 1276500-47-0 | C6D12Cl3O4P   | 6.0  | [M+H] <sup>+</sup> | 297.0365 | , TDCPP, Tris(2-chloroethyl) phosphate                                                                                                    |
| Venlafaxine-d6                   | 1062606-12-5 | C17D6H21NO2   | 5.1  | [M+H] <sup>+</sup> | 284.2491 | Chlorpheniramine, Meprobamate, N,N-Didesmethylvenlafaxine, O-Desmethylvenlafaxine, rac threo-Dihydrobupropion, Venlafaxine                |

n/a = information not available

**Table S3:** List of 24 MPs used in batch experiments with CAS numbers, chemical formulas, adducts, exact masses, retention times, and diagnostic fragments.

| <b>Micropollutant</b>            | <b>pK<sub>a</sub></b> | <b>Species at neutral pH</b> | <b>logD</b> | <b>logK<sub>oc</sub></b> | <b>K<sub>d</sub></b> |
|----------------------------------|-----------------------|------------------------------|-------------|--------------------------|----------------------|
| Acetaminophen                    | 9.46                  | neutral                      | 0.75        | 1.32                     | 7.31                 |
| Caffeine                         | n/a                   | neutral                      | -0.7        | 0.98                     | 0.07                 |
| Adrenosterone                    | n/a                   | neutral                      | 2.81        | 2.1                      | 44.06                |
| N4-acetylsulfamethoxazole        | 5.88                  | negative                     | -0.3        | 1.71                     | 17.95                |
| Theophylline                     | 11.44                 | neutral                      | -0.73       | 1                        | 3.5                  |
| Serotonin                        | 9.31                  | positive                     | -1.01       | 1.19                     | 5.42                 |
| Ethyl butylacetylaminopropionate | n/a                   | neutral                      | 0.94        | 1.65                     | 15.63                |
| Amphetamine                      | 10.01                 | positive                     | -0.55       | 1.88                     | 26.55                |
| Gabapentin                       | 9.91                  | neutral                      | 1.09        | -0.47                    | 0.12                 |
| Benzoyllecgonine                 | 9.54                  | neutral                      | -0.38       | -0.7                     | 0.07                 |
| Diphenhydramine                  | 8.87                  | positive                     | 2.39        | 2.58                     | 133.07               |
| Bupropion                        | 8.22                  | positive                     | 2.89        | 3.21                     | 567.63               |
| Sotalol                          | 9.43                  | positive                     | -2.41       | 0.74                     | 1.92                 |
| DEET                             | n/a                   | neutral                      | 2.59        | 1.86                     | 25.36                |
| Ketoprofen                       | 3.88                  | negative                     | 0.69        | 2.08                     | 42.08                |
| 2,4-D                            | 2.81                  | negative                     | -0.87       | 1.77                     | 20.61                |
| Mecoprop                         | 3.47                  | negative                     | -0.23       | 1.98                     | 33.42                |
| Tramadol                         | 9.23                  | positive                     | 0.85        | 1.96                     | 31.92                |
| Methocarbamol                    | 13.36                 | neutral                      | 0.43        | 0.88                     | 2.66                 |
| Lamotrigine                      | 5.87                  | neutral                      | 2.11        | 2.18                     | 52.97                |
| Losartan                         | 8.30                  | neutral                      | 5.27        | 3.2                      | 554.71               |
| Bentazone                        | 2.03                  | negative                     | 0.01        | 2.11                     | 45.09                |
| Ritalinic Acid                   | 10.08                 | neutral                      | -0.11       | -0.48                    | 0.12                 |
| Acesulfame                       | 3.02                  | negative                     | -1.43       | 0.35                     | 0.78                 |

Field sampling campaign

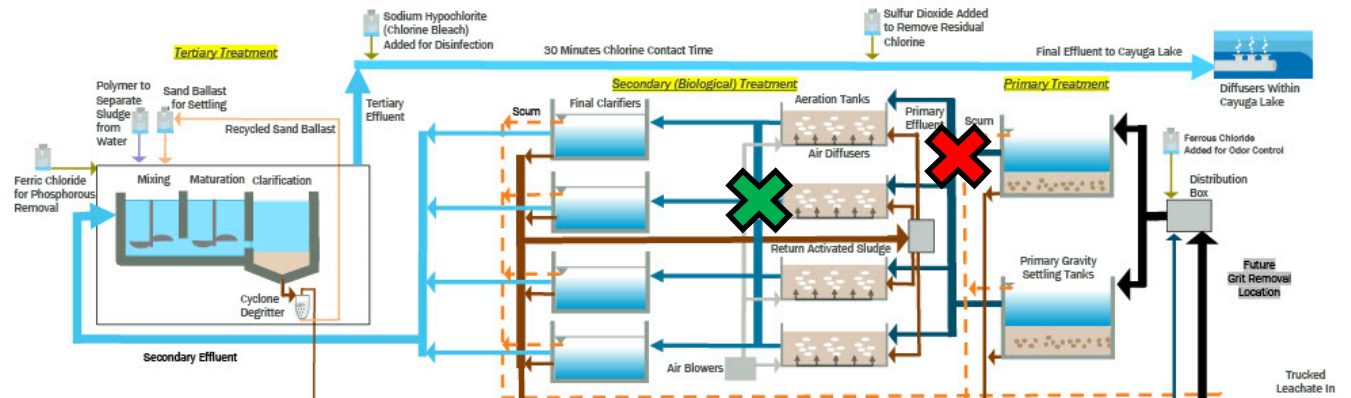

**Figure S1:** Process flow diagram of the studied WWTP along with sampling locations depicted with a red (CAS\_inf) and green (CAS\_eff) X symbol. We note that the influent samples for the CAS process (CAS\_inf) were collected after primary settling and before mixing with the return activated sludge. (source: <https://www.cityofithaca.org/687/Plant-Schematic>)

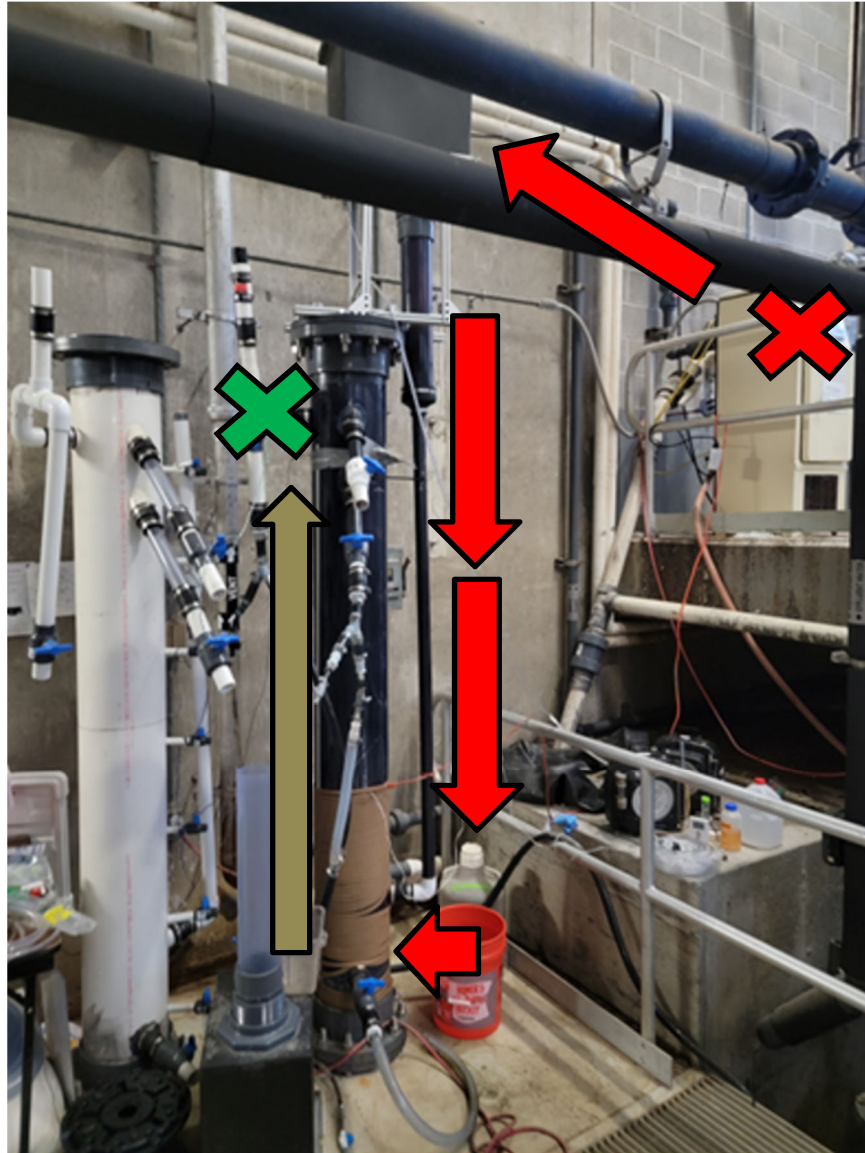

**Figure S2:** Process flow diagram of the studied UASB along with sampling locations depicted with a red (UASB\_inf) and green (UASB\_eff) X symbol. We note that the influent samples for the UASB process (UASB\_inf) were collected from the outlet of a peristaltic pump that feeds untreated wastewater (after bar screening) to the UASB.

**Table S4:** WWTP operational parameters measured during the sampling period.

|                                               | <b>UASB Inf</b>   | <b>UASB Eff</b>      | <b>CAS Inf</b>    | <b>CAS Eff</b> |
|-----------------------------------------------|-------------------|----------------------|-------------------|----------------|
| <b>pH</b>                                     | 7.57              | 7.23                 | 7.48              | 7.19           |
| <b>T (°C)</b>                                 | 21.1              | 22.4                 | 21.2              | 22             |
| <b>HRT</b>                                    | 9.5 hours         |                      | 8 hours           |                |
|                                               | <b>UASB - top</b> | <b>UASB - bottom</b> | <b>CAS Center</b> |                |
| <b>Sludge/Granule TSS (mg/mL)<sup>1</sup></b> | 7.2               | 36.4                 | 1.2               |                |

<sup>1</sup>sludge was collected from the top and bottom of the UASB for TSS analysis.



### *Preparation of wastewater samples*

The self-packed mixed bed cartridges contained three layers separated by polyethylene frits. The bottom layer consisted of 200 mg Envi-CARB (Supelclean) media. The middle layer was 350 mg of a 1:1:1.5 (by mass) mixture of Strata X-AW (Phenomenex), Strata X-CW (Phenomenex), and Isolute ENV+ (Biotage), respectively. The final layer was 200 mg of Oasis HLB (Waters) media. The cartridges were conditioned before sample loading by passing a mixture of 5 mL methanol and 10 mL nanopure water through each cartridge. The sample loading rate was controlled at approximately 1-3 drops per second. The cartridges were eluted using 6 mL of 50:50 v/v ethyl acetate/methanol with 0.5% ammonia, 3 mL of 50:50 v/v ethyl acetate/methanol with 1.7% formic acid, and 2 mL of pure methanol. The extracts were evaporated under a stream of high-purity nitrogen to 100  $\mu\text{L}$  and reconstituted to 1 mL using nanopure water. The extracted samples were filtered (regenerated cellulose, 0.45  $\mu\text{m}$ , Thermo Scientific) and stored at  $-20\text{ }^{\circ}\text{C}$  and in the dark until analysis. We also prepared a 9-point calibration curve by spiking the mixture of the 175 MPs into 1 L of nanopure water to generate standards at concentrations of 0, 1, 5, 25, 50, 100, 250, 500, and 750  $\text{ng L}^{-1}$ . The calibration standards were likewise spiked with 20  $\mu\text{L}$  of the ILIS mixture and loaded onto the mixed-bed SPE cartridges and eluted as described in the preceding.

### *Sample Analysis*

Briefly, samples were measured using reversed-phase liquid chromatography (Ultimate 3000, Thermo Scientific) coupled to high-resolution quadrupole-orbitrap mass spectrometry (QExactive, Thermo Scientific) with 30  $\mu$ L injections of samples stored at 4 °C during the analysis. Samples were separated using a mobile phase gradient of LC-MS grade water (OmniSolv, 58201, solvent A) and methanol (OmniSolv, 58215, solvent B) – both containing 0.1% (v/v) formic acid – over an XBridge C18 column (Waters, 186003021, particle size: 3.5  $\mu$ m, flow rate: 0.2 mL/min, gradient properties: 0 – 5 min: 5% B, 5 – 21 min: 5% B – 95% B (linear increase), 21 – 25 min: 95% B, 25 – 30 min: 5% B). We performed full-scan MS acquisitions (100-1000 m/z, resolution 140,000) in electrospray ionization positive-negative switch mode. Data dependent MS2 spectra were acquired at the exact masses and retention times of all target MPs and ILISs with additional MS2 spectra collected for the TopN MS features if the inclusion list was not triggered. For absolute quantification of target analytes, we used ILIS normalized peak areas obtained with Xcalibur Quanbrowser (Thermo Scientific, Version 4.0.27.19) and a calibration series (concentration range: 0-750  $\mu$ g/L after passing through SPE) with 1/x least-squares regression.

Quality Control

**Table S5:** List of MPs with R<sup>2</sup>, LOQ, and number of detections in *CAS inf*, *CAS eff*, *UASB inf*, *UASB eff* samples.

| Micropollutant                | R <sup>2</sup> | LOQ (ng/L) | N<br>UASB_inf | N<br>UASB_eff | N<br>CAS_inf | N<br>CAS_eff |
|-------------------------------|----------------|------------|---------------|---------------|--------------|--------------|
| 10,11-dihydrocarbamazepine    | 0.9978         | 1          | 0             | 0             | 0            | 0            |
| 2-Aminobenzothiazole          | 0.9864         | 1          | 0             | 0             | 0            | 0            |
| 2-ethyl-2-phenyl_malonamide   | 0.9819         | 25         | 9             | 0             | 6            | 0            |
| 2-Mercaptobenzothiazole       | 0.0076         | DNM        | DNM           | DNM           | DNM          | DNM          |
| 2-Methylthiobenzothiazole     | 0.1013         | DNM        | DNM           | DNM           | DNM          | DNM          |
| 2,2,4-Trimethyl-1,2-Dihydr    | 1.0000         | 500        | 0             | 0             | 0            | 0            |
| 2,2 -Dithiobis(benzothiazole) | 0.0145         | DNM        | DNM           | DNM           | DNM          | DNM          |
| 2,4-D                         | 0.9990         | 1          | 9             | 8             | 9            | 9            |
| 2,6-dimethoxyphenol           | 0.0128         | DNM        | DNM           | DNM           | DNM          | DNM          |
| Abacavir                      | 0.9934         | 25         | 0             | 0             | 0            | 0            |
| Acebutolol                    | 0.9786         | 50         | 0             | 0             | 0            | 0            |
| Acesulfame                    | 0.8882         | 1          | 9             | 9             | 9            | 9            |
| Acetaminophen                 | 0.9822         | 1          | 9             | 9             | 9            | 9            |
| Acetazolamide                 | 0.9986         | 25         | 0             | 0             | 0            | 0            |
| Acetochlor Alachlor           | 0.9759         | 5          | 0             | 0             | 0            | 0            |
| Adenosine                     | 0.0115         | DNM        | DNM           | DNM           | DNM          | DNM          |
| Adrenalone                    | 0.0201         | DNM        | DNM           | DNM           | DNM          | DNM          |
| Adrenosterone                 | 0.9916         | 1          | 9             | 9             | 9            | 9            |
| Alachlor-OXA                  | 0.9304         | 1          | 2             | 0             | 2            | 8            |
| Albuterol                     | 0.9943         | 1          | 0             | 0             | 0            | 0            |
| Allopurinol                   | 0.0190         | DNM        | DNM           | DNM           | DNM          | DNM          |
| Amisulpride                   | 0.9815         | 25         | 0             | 0             | 0            | 0            |
| Amitriptyline                 | 0.9387         | 50         | 0             | 0             | 0            | 0            |
| Amphetamine                   | 0.9950         | 1          | 8             | 9             | 9            | 6            |
| Ampicillin                    | 1.0000         | 500        | 0             | 0             | 0            | 0            |
| Arecoline                     | 0.9027         | 5          | 9             | 8             | 5            | 1            |
| Atenolol                      | 0.9955         | 1          | 9             | 9             | 9            | 9            |
| Atenolol Acid                 | 0.9969         | 1          | 9             | 9             | 9            | 9            |
| Atomoxetine                   | 0.8148         | 5          | 0             | 0             | 0            | 0            |
| Atorvastatin                  | 0.9571         | 25         | 0             | 0             | 0            | 0            |
| Atrazine                      | 0.9892         | 1          | 0             | 1             | 0            | 7            |
| Atrazine-2-hydroxy            | 0.7951         | DNM        | DNM           | DNM           | DNM          | DNM          |
| Atrazine-desethyl             | 0.8799         | 250        | 0             | 0             | 0            | 0            |
| Atropine                      | 0.9506         | 50         | 4             | 8             | 0            | 7            |
| Baclofen                      | 0.9499         | 50         | 0             | 0             | 0            | 0            |
| Bentazone                     | 0.9749         | 1          | 9             | 9             | 9            | 9            |
| Benzophenone                  | 0.0015         | DNM        | DNM           | DNM           | DNM          | DNM          |
| Benzothiazole                 | 0.0237         | DNM        | DNM           | DNM           | DNM          | DNM          |
| Benzotriazole                 | 0.9556         | 100        | 9             | 9             | 9            | 9            |
| Benzotriazole methyl-1H       | 0.9903         | 1          | 9             | 9             | 9            | 9            |
| Benzoyllecgonine              | 0.9924         | 50         | 9             | 9             | 9            | 9            |
| Bupropion                     | 0.9954         | 25         | 6             | 9             | 9            | 9            |
| Butalbital                    | 0.9703         | 1          | 2             | 0             | 3            | 1            |
| Caffeine                      | 0.8979         | 50         | 9             | 9             | 9            | 8            |
| Candesartan                   | 0.9960         | 5          | 0             | 0             | 0            | 0            |
| Carbamazepine                 | 0.1958         | DNM        | DNM           | DNM           | DNM          | DNM          |
| Carbamazepine-10,11-epoxide   | 0.9950         | 1          | 5             | 9             | 9            | 9            |
| Carbendazim                   | 0.9980         | 25         | 0             | 9             | 0            | 9            |

|                            |        |     |     |     |     |     |
|----------------------------|--------|-----|-----|-----|-----|-----|
| Carisoprodol               | 0.9994 | 1   | 1   | 1   | 0   | 0   |
| Celecoxib                  | 0.9924 | 5   | 0   | 0   | 0   | 0   |
| Cetirizine                 | 0.8999 | 1   | 9   | 0   | 9   | 9   |
| Chlorpheniramine           | 0.9958 | 100 | 0   | 0   | 0   | 0   |
| Cimetidine                 | 0.8669 | 250 | 0   | 0   | 0   | 0   |
| Ciprofloxacin              | 1.0000 | 250 | 0   | 0   | 0   | 0   |
| Citalopram                 | 0.9978 | 25  | 0   | 0   | 4   | 9   |
| Citric Acid                | 0.0007 | DNM | DNM | DNM | DNM | DNM |
| Clarithromycin             | 0.9882 | 25  | 0   | 0   | 0   | 5   |
| Climbazole                 | 0.7393 | DNM | DNM | DNM | DNM | DNM |
| Clindamycin                | 0.8677 | 25  | 0   | 0   | 0   | 9   |
| Codeine                    | 0.9914 | 25  | 2   | 9   | 0   | 6   |
| Corticosterone             | 0.9988 | 1   | 9   | 3   | 9   | 0   |
| Cotinine                   | 0.9771 | 1   | 9   | 4   | 9   | 4   |
| Coumarin                   | 0.7260 | DNM | DNM | DNM | DNM | DNM |
| DEET                       | 0.9779 | 1   | 9   | 9   | 9   | 9   |
| Desmethylvenlafaxine       | 0.9919 | 25  | 9   | 9   | 9   | 9   |
| Dexamethasone              | 0.9392 | 1   | 0   | 0   | 0   | 0   |
| Dextromethorphan           | 0.9989 | 25  | 0   | 0   | 1   | 8   |
| Diclofenac                 | 0.9972 | 5   | 0   | 0   | 0   | 0   |
| Diethyl phthalate          | 0.0218 | DNM | DNM | DNM | DNM | DNM |
| Dimethyl phthalate         | 0.4040 | DNM | DNM | DNM | DNM | DNM |
| Diphenhydramine            | 0.9249 | 1   | 7   | 3   | 9   | 9   |
| Efavirenz                  | 0.9956 | 25  | 0   | 0   | 0   | 0   |
| Emtricitabine              | 0.9501 | 50  | 0   | 9   | 6   | 9   |
| Estrone                    | 0.0315 | DNM | DNM | DNM | DNM | DNM |
| Ethyl butylacetylaminoprop | 0.8874 | 1   | 9   | 9   | 9   | 9   |
| Famciclovir                | 1.0000 | 500 | 0   | 0   | 0   | 0   |
| Famotidine                 | 1.0000 | 500 | 0   | 0   | 0   | 1   |
| Fenofibric Acid            | 0.9408 | 1   | 9   | 0   | 9   | 8   |
| Fexofenadine               | 0.9944 | 1   | 8   | 0   | 9   | 2   |
| Fluconazole                | 0.9884 | 25  | 7   | 9   | 9   | 9   |
| Flucytosine                | 0.9731 | 25  | 0   | 8   | 1   | 9   |
| Fluoxetine                 | 0.6895 | DNM | DNM | DNM | DNM | DNM |
| Fluridone                  | 0.7890 | DNM | DNM | DNM | DNM | DNM |
| Furosemide                 | 0.9494 | 5   | 5   | 0   | 9   | 7   |
| Gabapentin                 | 0.9687 | 25  | 9   | 9   | 9   | 9   |
| Gabapentin lactam          | 0.9387 | 100 | 9   | 9   | 9   | 9   |
| Gemfibrozil                | 0.4566 | DNM | DNM | DNM | DNM | DNM |
| Hexamethylphosphoramide    | 0.9975 | 25  | 0   | 0   | 0   | 2   |
| Hydrochlorothiazide        | 0.9903 | 5   | 0   | 0   | 0   | 0   |
| Hydrocodone                | 0.9884 | 25  | 3   | 9   | 2   | 6   |
| Hydrocortisone             | 0.9899 | 1   | 1   | 4   | 3   | 3   |
| Ibuprofen Na               | 0.9954 | 50  | 0   | 0   | 0   | 0   |
| Iodocarb                   | 0.0000 | DNM | DNM | DNM | DNM | DNM |
| Iohexol                    | 0.9468 | 250 | 3   | 9   | 9   | 9   |
| Iopromide                  | 0.9725 | 250 | 0   | 0   | 0   | 0   |
| Irbesartan                 | 0.9925 | 1   | 2   | 0   | 9   | 9   |
| Irgarol                    | 0.9893 | 1   | 0   | 0   | 0   | 0   |
| Isophorone Diisocyanate K  | 0.9900 | 25  | 0   | 0   | 0   | 0   |
| Ketamine                   | 0.9558 | 50  | 0   | 1   | 0   | 9   |
| Ketoprofen                 | 0.9941 | 1   | 8   | 0   | 9   | 2   |
| Lamotrigine                | 0.9930 | 50  | 9   | 9   | 9   | 9   |
| Levamisol                  | 0.9950 | 25  | 0   | 0   | 0   | 5   |

|                            |        |     |     |     |     |     |
|----------------------------|--------|-----|-----|-----|-----|-----|
| Levetiracetam              | 0.9777 | 5   | 9   | 0   | 6   | 0   |
| Levofloxacin               | 0.9637 | 50  | 0   | 0   | 0   | 0   |
| Lidocaine                  | 0.9231 | 50  | 9   | 9   | 9   | 9   |
| Losartan                   | 0.9893 | 5   | 9   | 8   | 9   | 9   |
| Mabuterol                  | 0.9929 | 50  | 0   | 0   | 0   | 0   |
| Mecoprop                   | 0.9989 | 1   | 9   | 9   | 9   | 9   |
| Melamine                   | 1.0000 | 750 | 0   | 0   | 0   | 0   |
| Meprobamate                | 0.9757 | 25  | 0   | 0   | 0   | 0   |
| Metalaxyl                  | 0.9976 | 1   | 9   | 9   | 9   | 9   |
| Metaxalone                 | 0.5730 | DNM | DNM | DNM | DNM | DNM |
| Metformin                  | 0.5952 | DNM | DNM | DNM | DNM | DNM |
| Methadone                  | 0.8458 | 1   | 0   | 0   | 0   | 9   |
| Methocarbamol              | 0.9853 | 50  | 8   | 9   | 9   | 9   |
| Metolachlor                | 0.9659 | 1   | 0   | 0   | 0   | 0   |
| Metolachlor-ESA            | 0.9878 | 5   | 0   | 0   | 0   | 0   |
| Metolachlor-OXA            | 0.9973 | 1   | 9   | 9   | 9   | 9   |
| Metoprolol                 | 0.9782 | 25  | 9   | 9   | 8   | 9   |
| Metronidazole              | 0.9883 | 5   | 0   | 0   | 0   | 9   |
| Morphine                   | 0.9986 | 5   | 1   | 0   | 0   | 0   |
| N,N-didesmethylvenlafaxine | 0.9860 | 5   | 6   | 9   | 5   | 9   |
| N4-acetylsulfamethoxazole  | 0.9913 | 25  | 9   | 0   | 9   | 9   |
| Nadolol                    | 0.9706 | 25  | 0   | 1   | 0   | 5   |
| Naproxen                   | 0.1369 | DNM | DNM | DNM | DNM | DNM |
| Nicotine                   | 0.9276 | 1   | 9   | 4   | 9   | 4   |
| Norfloxacin                | 0.9509 | 250 | 0   | 0   | 0   | 0   |
| Ofloxacin                  | 0.9485 | 50  | 0   | 0   | 0   | 0   |
| Oxazepam                   | 0.9694 | 5   | 0   | 0   | 0   | 4   |
| Oxcarbazepine              | 0.9950 | 1   | 5   | 9   | 9   | 9   |
| Oxybenzone                 | 0.8724 | 1   | 0   | 0   | 0   | 0   |
| Theophylline               | 0.9705 | 5   | 9   | 9   | 9   | 1   |
| Penciclovir                | 0.8086 | DNM | DNM | DNM | DNM | DNM |
| Pentobarbital              | 0.0433 | DNM | DNM | DNM | DNM | DNM |
| Pentoxifylline             | 0.9905 | 25  | 0   | 0   | 2   | 0   |
| Perfluorooctanoic Acid     | 0.9921 | 1   | 9   | 9   | 9   | 9   |
| PFBA                       | 0.9948 | 1   | 0   | 0   | 0   | 0   |
| Phenobarbital              | 0.9438 | 5   | 2   | 0   | 3   | 3   |
| Phenytoin                  | 0.0050 | DNM | DNM | DNM | DNM | DNM |
| Primidone                  | 0.9937 | 50  | 3   | 9   | 0   | 9   |
| Progesterone               | 0.0014 | DNM | DNM | DNM | DNM | DNM |
| Prometon                   | 0.9926 | 1   | 0   | 0   | 0   | 0   |
| Propazine                  | 0.8721 | 1   | 0   | 0   | 0   | 3   |
| Propranolol                | 0.0093 | DNM | DNM | DNM | DNM | DNM |
| Pseudoephedrine            | 0.9567 | 1   | 9   | 0   | 9   | 0   |
| rac-threo-Dihydrobupropion | 0.9964 | 5   | 0   | 0   | 0   | 0   |
| Ranitidine                 | 1.0000 | 500 | 0   | 0   | 0   | 0   |
| Ritalinic Acid             | 0.9803 | 50  | 9   | 9   | 8   | 9   |
| Saccharin                  | 0.9349 | 1   | 8   | 0   | 9   | 8   |
| Serotonin                  | 0.9925 | 1   | 9   | 9   | 9   | 9   |
| Siduron                    | 0.7962 | DNM | DNM | DNM | DNM | DNM |
| Simazine                   | 0.0356 | DNM | DNM | DNM | DNM | DNM |
| Sitagliptin                | 0.9251 | 250 | 0   | 0   | 0   | 0   |
| Sotalol                    | 0.9968 | 5   | 5   | 8   | 8   | 9   |
| Sucralose FA               | 0.4073 | DNM | DNM | DNM | DNM | DNM |
| Sulfadimethoxine           | 0.9774 | 100 | 0   | 0   | 0   | 0   |

|                              |        |     |     |     |     |     |
|------------------------------|--------|-----|-----|-----|-----|-----|
| Sulfamethazine               | 0.9100 | 250 | 0   | 0   | 0   | 0   |
| Sulfamethoxazole             | 0.9754 | 250 | 3   | 2   | 4   | 6   |
| Sulfathiazole                | 0.9672 | 50  | 0   | 0   | 0   | 0   |
| TDCPP                        | 0.8421 | 1   | 0   | 0   | 0   | 0   |
| Temazepam                    | 0.9909 | 1   | 0   | 1   | 0   | 8   |
| Testosterone                 | 0.9944 | 1   | 9   | 9   | 9   | 9   |
| Thiabendazole                | 0.9735 | 25  | 0   | 0   | 0   | 0   |
| Tramadol                     | 0.9943 | 25  | 9   | 9   | 9   | 9   |
| Triamterene                  | 0.9766 | 50  | 0   | 0   | 0   | 0   |
| Tributyl phosphate           | 0.8598 | 1   | 2   | 0   | 7   | 0   |
| Triclosan                    | 0.0765 | DNM | DNM | DNM | DNM | DNM |
| Triethylphosphate            | 0.6438 | DNM | DNM | DNM | DNM | DNM |
| Trimethoprim                 | 0.9952 | 1   | 4   | 0   | 9   | 1   |
| Triphenyl phosphate          | 0.5174 | DNM | DNM | DNM | DNM | DNM |
| Tris(2-chloroethyl)phosphate | 0.9429 | 1   | 0   | 0   | 2   | 0   |
| Valsartan                    | 0.5874 | DNM | DNM | DNM | DNM | DNM |
| Venlafaxine                  | 0.9909 | 1   | 9   | 9   | 9   | 9   |
| Verapamil                    | 0.9933 | 25  | 0   | 0   | 0   | 0   |
| Warfarin                     | 0.0234 | DNM | DNM | DNM | DNM | DNM |

## Results and Discussion

Summary data from sampling of full-scale CAS and UASB.

**Table S6:** List of 88 MPs measured in CAS *inf* and UASB *inf* and their average concentration in all samples.

| MPs                         | R <sup>2</sup> | LOQ | Average UASB <i>inf</i> [ $\mu\text{g/L}$ ] | Average UASB <i>eff</i> [ $\mu\text{g/L}$ ] | Average CAS <i>inf</i> [ $\mu\text{g/L}$ ] | Average CAS <i>eff</i> [ $\mu\text{g/L}$ ] |
|-----------------------------|----------------|-----|---------------------------------------------|---------------------------------------------|--------------------------------------------|--------------------------------------------|
| 2,4-D                       | 0.9990         | 1   | 308                                         | 30                                          | 211                                        | 134                                        |
| 2-ethyl-2-phenyl_malonamide | 0.9819         | 25  | 2772                                        | 0                                           | 717                                        | 0                                          |
| Acesulfame                  | 0.8882         | 1   | 17314                                       | 11082                                       | 16792                                      | 1920                                       |
| Acetaminophen               | 0.9822         | 1   | 111043                                      | 18705                                       | 60697                                      | 2267                                       |
| Adrenosterone               | 0.9916         | 1   | 2942                                        | 332                                         | 2295                                       | 159                                        |
| Alachlor-OXA                | 0.9304         | 1   | 1328                                        | 0                                           | 98                                         | 109                                        |
| Amphetamine                 | 0.9950         | 1   | 1601                                        | 659                                         | 685                                        | 69                                         |
| Arecoline                   | 0.9027         | 5   | 298                                         | 256                                         | 117                                        | 277                                        |
| Atenolol                    | 0.9955         | 1   | 1580                                        | 968                                         | 693                                        | 771                                        |
| Atenolol_Acid               | 0.9969         | 1   | 4603                                        | 4052                                        | 3106                                       | 4340                                       |
| Atrazine                    | 0.9892         | 1   | 0                                           | 11                                          | 0                                          | 18                                         |
| Atropine                    | 0.9506         | 50  | 688                                         | 208                                         | 0                                          | 83                                         |
| Bentazone                   | 0.9749         | 1   | 17                                          | 6                                           | 3                                          | 2                                          |
| Benzotriazole               | 0.9556         | 100 | 5595                                        | 51015                                       | 9081                                       | 5722                                       |
| Benzotriazole_methyl-1H     | 0.9903         | 1   | 21616                                       | 70399                                       | 36431                                      | 47196                                      |
| Benzoyllecgonine            | 0.9924         | 50  | 6562                                        | 51540                                       | 4079                                       | 599                                        |
| Bupropion                   | 0.9954         | 25  | 1761                                        | 627                                         | 2861                                       | 3087                                       |
| Butalbital                  | 0.9703         | 1   | 83                                          | 0                                           | 25                                         | 33                                         |
| Caffeine                    | 0.8979         | 50  | 71771                                       | 21833                                       | 40506                                      | 965                                        |
| Carbamazepine-10,11-epoxide | 0.9950         | 1   | 258                                         | 298                                         | 311                                        | 268                                        |
| Carbendazim                 | 0.9980         | 25  | 0                                           | 163                                         | 0                                          | 140                                        |
| Carisoprodol                | 0.9994         | 1   | 41                                          | 19                                          | 0                                          | 0                                          |
| Cetirizine                  | 0.8999         | 1   | 1606                                        | 0                                           | 975                                        | 1840                                       |
| Citalopram                  | 0.9978         | 25  | 0                                           | 0                                           | 442                                        | 345                                        |
| Clarithromycin              | 0.9882         | 25  | 0                                           | 0                                           | 0                                          | 387                                        |
| Clindamycin                 | 0.8677         | 25  | 0                                           | 0                                           | 0                                          | 637                                        |
| Codeine                     | 0.9914         | 25  | 254                                         | 105                                         | 0                                          | 70                                         |
| Corticosterone              | 0.9988         | 1   | 1462                                        | 1095                                        | 805                                        | 0                                          |
| Cotinine                    | 0.9771         | 1   | 1186                                        | 723                                         | 895                                        | 122                                        |
| DEET                        | 0.9779         | 1   | 7206                                        | 9658                                        | 3967                                       | 985                                        |
| Desmethylvenlafaxine        | 0.9919         | 25  | 2080                                        | 6339                                        | 1758                                       | 2662                                       |
| Dextromethorphan            | 0.9989         | 25  | 0                                           | 0                                           | 261                                        | 271                                        |
| Diphenhydramine             | 0.9249         | 1   | 1204                                        | 108                                         | 1725                                       | 1835                                       |
| Emtricitabine               | 0.9501         | 50  | 0                                           | 6058                                        | 1732                                       | 3724                                       |

|                                  |        |     |       |       |       |       |
|----------------------------------|--------|-----|-------|-------|-------|-------|
| Ethyl_butylacetylaminopropionate | 0.8874 | 1   | 3544  | 890   | 3770  | 430   |
| Famotidine                       | 1.0000 | 500 | 0     | 0     | 0     | 6184  |
| Fenofibric_Acid                  | 0.9408 | 1   | 24287 | 0     | 24223 | 42692 |
| Fexofenadine                     | 0.9944 | 1   | 4630  | 0     | 4848  | 15658 |
| Fluconazole                      | 0.9884 | 25  | 758   | 338   | 367   | 398   |
| Flucytosine                      | 0.9731 | 25  | 0     | 21834 | 2773  | 8478  |
| Furosemide                       | 0.9494 | 5   | 1398  | 0     | 702   | 329   |
| Gabapentin                       | 0.9687 | 25  | 12158 | 9413  | 6129  | 1289  |
| Gabapentin_lactam                | 0.9387 | 100 | 12617 | 15387 | 6219  | 3446  |
| Hexamethylphosphoramide          | 0.9975 | 25  | 0     | 0     | 0     | 29    |
| Hydrocodone                      | 0.9884 | 25  | 349   | 190   | 265   | 168   |
| Hydrocortisone                   | 0.9899 | 1   | 1179  | 194   | 421   | 169   |
| Iohexol                          | 0.9468 | 250 | 54611 | 95882 | 82017 | 58500 |
| Irbesartan                       | 0.9925 | 1   | 65    | 0     | 75    | 109   |
| Ketamine                         | 0.9558 | 50  | 0     | 391   | 0     | 133   |
| Ketoprofen                       | 0.9941 | 1   | 131   | 0     | 94    | 26    |
| Lamotrigine                      | 0.9930 | 50  | 817   | 712   | 1145  | 2833  |
| Levamisol                        | 0.9950 | 25  | 0     | 0     | 0     | 123   |
| Levetiracetam                    | 0.9777 | 5   | 20232 | 0     | 9140  | 0     |
| Lidocaine                        | 0.9231 | 50  | 1752  | 5230  | 886   | 1317  |
| Losartan                         | 0.9893 | 5   | 423   | 177   | 505   | 359   |
| Mecoprop                         | 0.9989 | 1   | 3494  | 1732  | 795   | 1463  |
| Metalaxyl                        | 0.9976 | 1   | 226   | 91    | 50    | 69    |
| Methadone                        | 0.8458 | 1   | 0     | 0     | 0     | 8     |
| Methocarbamol                    | 0.9853 | 50  | 1989  | 838   | 1068  | 1071  |
| Metolachlor-OXA                  | 0.9973 | 1   | 79    | 77    | 81    | 53    |
| Metoprolol                       | 0.9782 | 25  | 1271  | 1248  | 1048  | 2097  |
| Metronidazole                    | 0.9883 | 5   | 0     | 0     | 0     | 195   |
| Morphine                         | 0.9986 | 5   | 232   | 0     | 0     | 0     |
| N,N-didesmethylvenlafaxine       | 0.9860 | 5   | 406   | 115   | 67    | 80    |
| N4-acetylsulfamethoxazole        | 0.9913 | 25  | 925   | 0     | 823   | 257   |
| Nadolol                          | 0.9706 | 25  | 0     | 219   | 0     | 111   |
| Nicotine                         | 0.9276 | 1   | 8976  | 108   | 2686  | 50    |
| Oxazepam                         | 0.9694 | 5   | 0     | 0     | 0     | 119   |
| Oxcarbazepine                    | 0.9950 | 1   | 258   | 298   | 311   | 268   |
| Paraxanthine_Theophylline        | 0.9705 | 5   | 8713  | 3116  | 6600  | 145   |
| Pentoxifylline                   | 0.9905 | 25  | 0     | 0     | 717   | 0     |
| Perfluorooctanoic_Acid           | 0.9921 | 1   | 428   | 105   | 172   | 114   |
| Phenobarbital                    | 0.9438 | 5   | 869   | 0     | 283   | 650   |
| Primidone                        | 0.9937 | 50  | 1268  | 475   | 0     | 467   |
| Propazine                        | 0.8721 | 1   | 0     | 0     | 0     | 14    |



|                              |        |     |       |      |       |       |
|------------------------------|--------|-----|-------|------|-------|-------|
| Pseudoephedrine              | 0.9567 | 1   | 12284 | 0    | 2842  | 0     |
| Ritalinic_Acid               | 0.9803 | 50  | 1246  | 6722 | 911   | 502   |
| Saccharin                    | 0.9349 | 1   | 96225 | 0    | 46736 | 11998 |
| Serotonin                    | 0.9925 | 1   | 1298  | 1581 | 866   | 277   |
| Sotalol                      | 0.9968 | 5   | 562   | 377  | 218   | 368   |
| Sulfamethoxazole             | 0.9754 | 250 | 3845  | 5172 | 3806  | 4671  |
| Temazepam                    | 0.9909 | 1   | 0     | 26   | 0     | 105   |
| Testosterone                 | 0.9944 | 1   | 1142  | 2863 | 312   | 283   |
| Tramadol                     | 0.9943 | 25  | 1107  | 995  | 1138  | 2021  |
| Tributyl_phosphate           | 0.8598 | 1   | 148   | 0    | 1323  | 0     |
| Trimethoprim                 | 0.9952 | 1   | 2335  | 0    | 966   | 637   |
| Tris(2-chloroethyl)phosphate | 0.9429 | 1   | 0     | 0    | 138   | 0     |
| Venlafaxine                  | 0.9909 | 1   | 711   | 858  | 704   | 931   |

*Batch experiments – biotransformation products*

**Table S7:** Analytical information for the 9 detected TPs.

| Parent MP                        | TP        | Formula of Neutral Molecule                                     | Exact Mass of [M+H] <sup>+</sup> Adduct | Extracted Mass | RT (min) | Fragment (m/z)   | Found in UASB_eff? <sup>2</sup> | Found in CAS_eff? |
|----------------------------------|-----------|-----------------------------------------------------------------|-----------------------------------------|----------------|----------|------------------|---------------------------------|-------------------|
| Caffeine                         | Caf_181   | C <sub>7</sub> H <sub>8</sub> N <sub>4</sub> O <sub>2</sub>     | 181.0720                                | 181.0791       | 2.66     | 124.05<br>84.96  | NO                              | NO                |
| Diphenhydramine                  | Dip_181   | C <sub>13</sub> H <sub>8</sub> O                                | 183.0810                                | 183.0805       | 8.63     | 105.03           | YES                             | YES               |
| Diphenhydramine                  | Dip_288   | C <sub>17</sub> H <sub>21</sub> NO <sub>2</sub>                 | 272.1645                                | 272.1643       | 5.89     | NF               | NO                              | NO                |
| Amphetamine                      | Amp_168   | C <sub>9</sub> H <sub>13</sub> NO                               | 152.1070                                | 152.1069       | 1.75     | 94.06<br>107.05  | NO                              | NO                |
| N-acetylsulfamethoxazole         | N-SMX_254 | C <sub>10</sub> H <sub>11</sub> N <sub>3</sub> O <sub>3</sub> S | 254.0594                                | 254.0591       | 3.65     | 108.04<br>156.01 | YES                             | YES               |
| Ethyl-butylacetylaminopropionate | EBP_188   | C <sub>9</sub> H <sub>17</sub> NO <sub>3</sub>                  | 188.1281                                | 188.1279       | 4.50     | NF               | NO                              | YES               |
| Adrenosterone                    | Adr_301   | C <sub>19</sub> H <sub>24</sub> O <sub>3</sub>                  | 301.1798                                | 301.1794       | 6.17     | 257.15<br>121.06 | NO                              | NO                |
| Adrenosterone                    | Adr_331   | C <sub>20</sub> H <sub>26</sub> O <sub>4</sub>                  | 331.1904                                | 331.1876       | 13.92    | 161.09           | NO                              | NO                |

<sup>1</sup>NF = no MS2 fragment could be identified; <sup>2</sup>UASB\_eff and CAS\_eff samples were screened for evidence of peaks at the extracted mass and RT of each TP.
